# Supplementary material
Source: MDPI journal article supplement (https://www.mdpi.com/2076-3417/14/8/3440)
Supplement: s1 [file s1]

Archive with 2 entries (2 files):
- Supplementary Figure.pdf
- Supplementary Tables.xlsx
