# Supplementary material
Source: MDPI journal article supplement (https://www.mdpi.com/2076-3417/14/8/3440)
Supplement: s1 [file s1 › Supplementary Tables.xlsx]

## Sheet: Table S1.
	Table S1. Chemical composition of volatile compounds identified in sea fennel leaves essential oils throughout a year period
	Compound	RI	RIL	January	February	March	April	May	June	July	August	September	October	November	December
	α-Thujene	921	924	0.41±0.01	0.02±0.00	0.03±0.00	0.06±0.04	0.09±0.00	0.14±0.00	0.11±0.03	0.13±0.00	0.19±0.00	0.14±0.01	0.04±0.01	0.06±0.01
	α-Pinene	927	932	8.14±0.16	3.8±0.10	7.68±0.00	3.15±0.02	2.89±0.17	1.57±0.00	0.48±0.03	0.61±0.00	0.56±0.01	1.34±0.10	1.07±0.01	0.82±0.04
	Camphene	941	943	0.14±0.01	0.07±0.00	0.09±0.00	0.03±0.01	0.03±0.00	0.04±0.00	0.09±0.06	0.07±0.00	0.05±0.00	0.16±0.02	0.07±0.00	0.09±0.00
	Sabinene	966	969	6.81±0.15	0.28±0.00	0.30±0.01	0.15±0.00	0.59±0.05	0.97±0.00	1.75±0.03	4.19±0.04	11.38±0.24	8.83±0.58	2.24±0.04	1.82±0.11
	β-Myrcene	985	988	1.33±0.03	0.56±0.02	0.56±0.01	0.41±0.01	0.26±0.01	0.47±0.01	0.43±0.02	0.66±0.01	1.01±0.05	1.55±0.15	0.72±0.02	0.91±0.04
	Octanal	999	998	0.52±0.03	0.91±0.04	0.56±0.03	0.48±0.03	0.45±0.09	0.58±0.01	0.28±0.10	0.15±0.04	0.19±0.01	0.38±0.05	0.17±0.03	0.48±0.04
	α-Terpinene	1011	1014	1.06±0.03	0.05±0.02	0.04±0.00	0.04±0.02	0.11±0.00	0.23±0.01	0.19±0.04	0.50±0.02	0.51±0.00	0.35±0.04	0.14±0.01	0.16±0.02
	p-Cymene	1018	1020	0.94±0.04	0.19±0.00	0.14±0.02	0.05±0.02	0.63±0.01	0.71±0.05	0.17±0.03	0.31±0.03	0.38±0.01	0.47±0.06	0.10±0.01	0.35±0.02
	Limonene	1023	1024	58.74±0.85	71.00±1.53	74.19±0.06	73.72±0.09	81.79±0.72	83.52±0.23	82.13±0.59	84.53±0.50	76.31±0.49	72.72±2.62	82.98±0.87	72.46±1.33
	(Z)-β-Ocimene	1032	1032	11.65±0.06	4.86±0.16	6.48±0.07	6.44±0.04	3.17±0.15	4.70±0.06	3.83±0.03	4.10±0.10	4.72±0.16	7.39±0.62	6.40±0.16	4.84±0.23
	(E)-β-Ocimene	1042	1044	0.45±0.02	0.19±0.02	0.23±0.02	0.25±0.02	tr.	tr.	n.d.	0.19±0.00	0.24±0.00	0.36±0.04	0.33±0.00	0.25±0.02
	γ-Terpinene	1052	1054	2.28±0.05	0.18±0.01	0.17±0.01	tr.	0.87±0.03	0.89±0.02	0.48±0.02	0.98±0.04	1.04±0.03	0.83±0.09	0.33±0.01	0.42±0.03
	Terpinolene	1082	1086	0.75±0.03	tr.	tr	n.d.	tr.	tr.	n.d.	tr.	0.15±0.01	0.46±0.05	n.d.	0.48±0.06
	(Z)-Sabinene hydrate	1093	1065	0.17±0.01	tr.	tr.	n.d.	0.16±0.02	tr.	0.29±0.03	0.18±0.01	0.21±0.01	tr.	tr.	tr.
	(Z)-p-Mentha-2,8-dien-1-ol	1115	1133	0.33±0.01	1.45±0.06	0.90±0.03	1.30±0.01	0.75±0.00	0.37±0.02	0.56±0.11	tr.	tr.	0.31±0.03	0.24±0.04	0.84±0.04
	(E)-Sabinene hydrate	1129	1098	0.16±0.01	0.91±0.06	0.47±0.00	n.d.	0.49±0.05	0.25±0.07	0.31±0.05	n.d.	tr.	0.17±0.02	0.15±0.04	0.60±0.01
	(Z)-Limonene oxide	1132	1132	0.15±0.00	0.33±0.00	0.32±0.00	0.46±0.02	0.84±0.01	0.33±0.01	0.42±0.08	tr.	tr.	tr.	0.16±0.02	tr.
	Terpinen-4-ol	1171	1174	0.90±0.05	0.38±0.01	0.24±0.02	tr.	0.68±0.01	0.47±0.05	1.47±0.03	1.25±0.08	1.72±0.05	0.59±0.09	0.64±0.18	0.68±0.04
	p-Mentha-1(7),8-dien-2-ol	1181	1187	n.d.	0.29±0.02	0.30±0.00	0.48±0.00	0.52±0.06	tr.	n.d.	n.d.	tr.	n.d.	n.d.	n.d
	α-Terpineol	1184	1186	0.30±0.02	0.93±0.09	tr.	n.d.	n.d.	0.19±0.01	0.66±0.06	0.29±0.02	0.21±0.02	0.25±0.04	0.43±0.05	2.23±0.012
	Dihydrocarvone	1191	1195	tr.	0.32±0.01	tr.	n.d.	0.65±0.01	0.64±0.01	0.36±0.06	n.d.	n.d.	n.d.	n.d.	n.d.
	(E)-Carveol	1213	1215	0.29±0.01	1.18±0.04	0.58±0.00	0.58±0.06	1.07±0.02	0.99±0.04	0.91±0.09	tr.	0.19±0.01	0.25±0.04	0.29±0.02	0.85±0.03
	Carvone	1238	1239	tr.	0.31±0.01	tr.	0.08±0.01	0.58±0.06	0.92±0.02	0.51±0.11	n.d.	tr.	tr.	n.d.	n.d
	Limonene-1,2-diol	1322	1343	0.17±0.01	0.63±0.04	0.31±0.01	0.25±0.03	1.01±0.05	0.33±0.00	0.49±0.02	tr.	tr.	tr.	n.d.	tr.
	Tetradecane	1400	1400	0.68±0.1	3.19±0.02	1.57±0.04	4.22±0.24	0.87±0.06	tr.	1.19±0.10	0.39±0.04	0.23±0.02	0.96±0.15	0.37±0.09	3.38±0.03
	Germacrene B	1548	1559	1.51±0.06	1.28±0.10	1.34±0.06	0.62±0.02	tr.	tr.	n.d.	n.d.	n.d.	tr.	0.29±0.13	0.12±0.12
	Hexadecane	1600	1600	0.72±0.00	3.10±0.34	1.47±0.1	4.04±0.09	0.50±0.1	tr.	0.69±0.07	0.28±0.01	tr.	0.68±0.13	0.17±0.03	3.00±0.16
	Octadecane	1800	1800	0.33±0.03	1.57±0.25	0.72±0.01	2.06±0.04	tr.	n.d.	0.13±0.01	tr.	tr.	0.38±0.07	n.d.	1.75±0.37
	Total chromatogram identified (%)			98.93	97.98	98.70	99.49	98.99	98.50	97.94	98.80	99.30	98.57	97.35	96.60

## Sheet: Table S2.
Table S2. Pearson correlations for weather conditions and sea fennel phytochemicals
		Average temperature (°C)	Relative humidity (%)	Average wind strength	Relative cloud cover (1/10)	α-Thujene	α-Pinene	Camphene	Sabinene	β-Myrcene	Octanal	α-Terpinen	p-Cymene	Limonene	(Z)-β-Ocimene	(E)-β-Ocimene	γ-Terpinene	α-Terpinolene	(Z)-Sabinene hydrate	(Z)-p-Mentha-2,8-dien-1-ol	(E)-Sabinene hydrate	(E)-Limonene oxide	Terpinen-4-ol	p-Mentha-1(7),8-dien-2-ol	α-Terpineol	Dihydrocarvone	(E)-Carveol	Carvone	Limonene-1,2-diol	Tetradecane	Germacrene B	Hexadecane	Octadecane	Neochlorogenic acid	Chlorogenic acid	4-O-Caffeoylquinic acid	Neoxantin	Violaxantin	Lutein	β-Carotene
Average temperature (°C)	Pearson Correlation	1	-.582*	-.589*	-0.514215	0.0571078	-.641*	-0.214648	0.264415	-0.174095	-.608*	0.0552934	0.0433857	.694*	-0.550697	-.581*	0.104349	-0.354598	.616*	-.587*	-.586*	-0.00522116	.647*	-0.322082	-0.276626	0.315463	-0.161233	0.389916	-0.0156438	-0.549876	-.770**	-.602*	-.627*	0.267195	.794**	.887**	0.0617914	-0.501109	0.248767	0.443166
	Sig. (2-tailed)		0.0469278	0.0440324	0.0872016	0.86007	0.0248203	0.502898	0.406259	0.588412	0.0358815	0.86448	0.893498	0.0122924	0.0635212	0.0473983	0.746895	0.258069	0.0328496	0.0447693	0.0454704	0.987152	0.0228831	0.307269	0.384086	0.317879	0.61665	0.210211	0.961514	0.0639981	0.00339191	0.0383546	0.0292101	0.401156	0.00204021	0.000120071	0.848707	0.0969939	0.435582	0.149044
Relative humidity (%)	Pearson Correlation	-.582*	1	0.19509	.822**	-0.00644798	0.0965398	0.192538	-0.103356	0.275056	0.130188	0.0111721	0.225831	-0.317677	0.234142	0.372185	0.0660833	0.536053	-0.451031	0.103011	0.214019	-0.181354	-0.299884	-0.0725305	.623*	-0.195165	0.0902308	-0.264474	-0.197352	0.246143	0.0596102	0.239895	0.312406	-0.152306	-0.496598	-.623*	0.0711122	0.144927	.588*	-0.0412825
	Sig. (2-tailed)	0.0469278		0.543439	0.00102918	0.984133	0.765349	0.548828	0.749236	0.386902	0.686746	0.972511	0.480341	0.314308	0.463886	0.233506	0.838316	0.0724122	0.141112	0.750049	0.504182	0.572701	0.343635	0.822753	0.030407	0.543282	0.780341	0.40615	0.538681	0.440599	0.853996	0.45265	0.322847	0.636537	0.100528	0.0304337	0.826172	0.653145	0.0443652	0.898637
Average wind strength	Pearson Correlation	-.589*	0.19509	1	0.428896	0.0241396	0.507516	-0.253003	-0.0979289	-0.129747	0.0368242	0.083802	-0.201289	-0.298642	0.321769	0.419827	-0.00827352	-0.0566199	-0.0941059	0.171039	0.110685	0.0605922	-0.150031	0.315664	-0.134623	-0.3837	-0.204302	-0.460192	-0.0396201	0.137039	.593*	0.195282	0.17883	-0.257728	-0.522735	-0.388198	0.220988	-0.0898695	-0.306402	0.0514175
	Sig. (2-tailed)	0.0440324	0.543439		0.164153	0.94064	0.0921193	0.427546	0.762058	0.687761	0.909542	0.795687	0.530443	0.345735	0.307765	0.174239	0.979641	0.861256	0.771124	0.595075	0.732013	0.851614	0.641642	0.317554	0.676577	0.218209	0.524177	0.132223	0.902701	0.671059	0.0421696	0.543035	0.578144	0.418668	0.081208	0.212403	0.490053	0.781201	0.332725	0.87391
Relative cloud cover (1/10)	Pearson Correlation	-0.514215	.822**	0.428896	1	0.0372559	0.254528	-0.0544527	-0.160026	0.0788585	-0.0508317	-0.00172266	0.160788	-0.242139	0.324993	0.347539	0.0525334	0.357842	-0.374004	0.0825192	0.0837846	0.0682805	-0.389929	0.181366	0.190658	-0.2295	-0.0543342	-0.268217	-0.152507	0.195865	0.096731	0.198709	0.239597	0.0984135	-0.329001	-.617*	0.149353	-0.110691	0.375522	0.139219
	Sig. (2-tailed)	0.0872016	0.00102918	0.164153		0.908485	0.424669	0.866524	0.619327	0.807534	0.875336	0.995761	0.617636	0.448304	0.302665	0.268334	0.871193	0.253429	0.231049	0.798758	0.795729	0.833006	0.210194	0.572675	0.552811	0.473044	0.866812	0.399288	0.636088	0.541807	0.764896	0.535837	0.453229	0.760911	0.29639	0.0324192	0.643167	0.731997	0.22901	0.666091
α-Thujene	Pearson Correlation	0.0571078	-0.00644798	0.0241396	0.0372559	1	0.322983	0.450576	.619*	.587*	-0.145811	.963**	.779**	-0.537177	.659*	0.390172	.956**	.707*	0.4597	-0.515445	-0.541626	-0.269076	0.420266	-0.426907	-0.183931	-0.139967	-0.41221	-0.108965	-0.228799	-0.443645	0.188326	-0.403396	-0.372558	-0.154298	-0.0719431	0.163255	.636*	-0.238013	0.280809	-0.0113839
	Sig. (2-tailed)	0.86007	0.984133	0.94064	0.908485		0.30584	0.141564	0.0320085	0.044773	0.651148	4.97331e-07	0.00284453	0.0717012	0.0196975	0.209885	1.17209e-06	0.0102053	0.132691	0.0863187	0.0689334	0.397721	0.173742	0.166332	0.567163	0.664389	0.183004	0.736044	0.474435	0.148554	0.557769	0.193484	0.233001	0.632081	0.824169	0.612179	0.0261057	0.456311	0.376637	0.97199
α-Pinene	Pearson Correlation	-.641*	0.0965398	0.507516	0.254528	0.322983	1	0.288475	-0.155238	0.0931414	0.529325	0.268308	0.269257	-.683*	.664*	0.3665	0.279678	0.296402	-0.163339	0.340361	0.258978	0.219484	-0.427294	0.359626	-0.282055	-0.129772	0.0392553	-0.177126	0.22035	0.123265	.903**	0.195033	0.181832	-0.0432136	-0.282199	-0.547038	0.00772609	0.37804	-0.435397	-0.342391
	Sig. (2-tailed)	0.0248203	0.765349	0.0921193	0.424669	0.30584		0.363181	0.62998	0.773416	0.0767698	0.399121	0.397391	0.0143451	0.018508	0.241288	0.378644	0.34954	0.611994	0.279009	0.416334	0.493087	0.165907	0.250899	0.374432	0.687702	0.903593	0.58183	0.491338	0.702714	5.85679e-05	0.54356	0.571671	0.893918	0.374179	0.0656676	0.980988	0.225651	0.157154	0.275965
Camphene	Pearson Correlation	-0.214648	0.192538	-0.253003	-0.0544527	0.450576	0.288475	1	0.461631	.819**	0.0224801	0.501517	0.273738	-.585*	.635*	.613*	0.407781	.755**	-0.00888635	-0.220115	-0.212305	-0.528174	0.0963227	-0.491161	0.199283	-0.456735	-0.348557	-0.450677	-0.390208	-0.125347	0.277451	-0.108823	-0.0555554	-.624*	-0.403708	-0.0958253	0.289132	0.545571	0.148311	-0.410148
	Sig. (2-tailed)	0.502898	0.548828	0.427546	0.866524	0.141564	0.363181		0.130861	0.00112251	0.944715	0.0966779	0.389273	0.0455808	0.0266287	0.0342147	0.188225	0.00448848	0.978134	0.491813	0.507683	0.0775324	0.765864	0.104901	0.534634	0.135534	0.266839	0.141464	0.209838	0.6979	0.382612	0.736376	0.863843	0.02999	0.193106	0.767043	0.362041	0.0665421	0.64551	0.185424
Sabinene	Pearson Correlation	0.264415	-0.103356	-0.0979289	-0.160026	.619*	-0.155238	0.461631	1	.800**	-0.46451	.688*	0.349386	-0.279557	0.336959	0.494188	.592*	0.532911	0.343812	-.689*	-.692*	-.633*	.613*	-0.548562	-0.135955	-0.441048	-.688*	-0.438222	-0.548885	-0.477858	-0.197438	-0.466361	-0.399981	-0.483972	-0.123319	0.479901	.702*	-0.0373842	0.346205	0.186155
	Sig. (2-tailed)	0.406259	0.749236	0.762058	0.619327	0.0320085	0.62998	0.130861		0.00179229	0.128163	0.0134713	0.265625	0.378859	0.284152	0.10245	0.0426386	0.0744256	0.273846	0.0132126	0.0125875	0.0271278	0.0338894	0.0647678	0.673532	0.151229	0.0134243	0.154174	0.0645781	0.116128	0.538501	0.126448	0.197641	0.110874	0.70259	0.114355	0.0108931	0.908171	0.270299	0.562401
β-Myrcene	Pearson Correlation	-0.174095	0.275056	-0.129747	0.0788585	.587*	0.0931414	.819**	.800**	1	-0.153669	.655*	0.389448	-.594*	.660*	.778**	0.543246	.839**	-0.0638859	-0.44172	-0.427683	-.733**	0.208048	-.578*	0.138541	-.581*	-.586*	-0.569588	-.637*	-0.215687	0.0901095	-0.189476	-0.096221	-.612*	-0.48065	0.00023976	0.569023	0.360197	0.340064	-0.122646
	Sig. (2-tailed)	0.588412	0.386902	0.687761	0.807534	0.044773	0.773416	0.00112251	0.00179229		0.633487	0.0206876	0.210806	0.041621	0.01946	0.00289751	0.0679445	0.000650065	0.843633	0.150533	0.16548	0.00667907	0.516428	0.0488752	0.667636	0.0477185	0.0450269	0.0532077	0.0257899	0.500784	0.780629	0.555322	0.766105	0.0344118	0.113709	0.99941	0.0534979	0.250092	0.279456	0.704149
Octanal	Pearson Correlation	-.608*	0.130188	0.0368242	-0.0508317	-0.145811	0.529325	0.0224801	-0.46451	-0.153669	1	-0.245294	0.126432	-0.47274	0.135742	-0.0756972	-0.162593	0.0555377	-0.487522	.775**	.810**	0.324471	-.629*	0.436253	0.186285	0.337284	.689*	0.303588	0.486636	0.53774	.627*	0.570529	0.570165	0.235729	-0.188668	-.585*	-0.495891	0.543354	-0.406781	-0.565271
	Sig. (2-tailed)	0.0358815	0.686746	0.909542	0.875336	0.651148	0.0767698	0.944715	0.128163	0.633487		0.442226	0.695397	0.12065	0.674019	0.81513	0.613642	0.863886	0.107896	0.00305309	0.00140381	0.303488	0.0285197	0.156248	0.562123	0.283657	0.0132654	0.337413	0.108635	0.0713468	0.0292611	0.0527268	0.0529129	0.460774	0.557042	0.0459035	0.101089	0.0678791	0.189417	0.0554534
α-Terpinen	Pearson Correlation	0.0552934	0.0111721	0.083802	-0.00172266	.963**	0.268308	0.501517	.688*	.655*	-0.245294	1	.689*	-0.504402	.642*	0.497495	.943**	.702*	0.455631	-.606*	-.620*	-0.446306	0.491752	-0.519598	-0.126274	-0.30249	-0.573135	-0.285411	-0.375459	-0.477106	0.181303	-0.428695	-0.390543	-0.351065	-0.182025	0.214129	.656*	-0.203538	0.323502	0.106382
	Sig. (2-tailed)	0.86448	0.972511	0.795687	0.995761	4.97331e-07	0.399121	0.0966779	0.0134713	0.0206876	0.442226		0.0132008	0.0944669	0.0244642	0.0998183	4.32734e-06	0.0108836	0.136602	0.0368056	0.0314713	0.145845	0.104419	0.0833811	0.695761	0.33925	0.0514114	0.368529	0.229095	0.116786	0.57281	0.164373	0.209413	0.263177	0.571257	0.503957	0.020408	0.525761	0.305018	0.74211
p-Cymene	Pearson Correlation	0.0433857	0.225831	-0.201289	0.160788	.779**	0.269257	0.273738	0.349386	0.389448	0.126432	.689*	1	-0.343927	0.384888	0.0532242	.873**	.596*	0.208998	-0.37856	-0.312225	0.0131141	0.161818	-0.229693	-0.111549	0.328252	-0.00431529	0.298209	0.11329	-0.466498	0.0261264	-0.443813	-0.406191	0.233574	0.187935	-0.0448394	0.452379	-0.0956748	0.48921	0.0199216
	Sig. (2-tailed)	0.893498	0.480341	0.530443	0.617636	0.00284453	0.397391	0.389273	0.265625	0.210806	0.695397	0.0132008		0.273675	0.216667	0.869512	0.000208614	0.0406348	0.514471	0.224961	0.323142	0.967734	0.615355	0.472662	0.729989	0.297558	0.989381	0.346469	0.725917	0.126321	0.935763	0.148382	0.190121	0.465001	0.558603	0.889948	0.139781	0.7674	0.1065	0.951
Limonene	Pearson Correlation	.694*	-0.317677	-0.298642	-0.242139	-0.537177	-.683*	-.585*	-0.279557	-.594*	-0.47274	-0.504402	-0.343927	1	-.800**	-.693*	-0.415695	-.775**	0.15002	-0.272853	-0.235384	0.223295	0.203421	-0.0207738	-0.167631	0.416926	0.0919372	0.443534	0.137592	-0.341277	-.726**	-0.394585	-0.436389	0.390822	.645*	0.461576	-0.16988	-0.353897	0.106234	0.451527
	Sig. (2-tailed)	0.0122924	0.314308	0.345735	0.448304	0.0717012	0.0143451	0.0455808	0.378859	0.041621	0.12065	0.0944669	0.273675		0.00177884	0.0123897	0.178961	0.00306859	0.641668	0.39087	0.461449	0.485416	0.526005	0.948906	0.602542	0.177547	0.776279	0.148668	0.669797	0.277633	0.00753349	0.20432	0.156104	0.209059	0.023661	0.130913	0.597611	0.259077	0.742458	0.140622
(Z)-β-Ocimene	Pearson Correlation	-0.550697	0.234142	0.321769	0.324993	.659*	.664*	.635*	0.336959	.660*	0.135742	.642*	0.384888	-.800**	1	.813**	0.53777	.721**	-0.180324	-0.0908689	-0.179998	-0.31013	-0.216135	-0.194856	-0.153797	-0.506824	-0.428325	-0.466174	-0.375792	-0.0309907	.634*	0.0378313	0.0806734	-0.338589	-.577*	-0.435137	0.470415	0.297917	-0.134726	-0.323048
	Sig. (2-tailed)	0.0635212	0.463886	0.307765	0.302665	0.0196975	0.018508	0.0266287	0.284152	0.01946	0.674019	0.0244642	0.216667	0.00177884		0.00130062	0.071328	0.0081515	0.574919	0.778821	0.575622	0.326573	0.499873	0.543934	0.6332	0.0926373	0.164777	0.12662	0.228648	0.923831	0.0268378	0.907077	0.80318	0.281681	0.0496688	0.157431	0.122743	0.346963	0.676342	0.305737
(E)-β-Ocimene	Pearson Correlation	-.581*	0.372185	0.419827	0.347539	0.390172	0.3665	.613*	0.494188	.778**	-0.0756972	0.497495	0.0532242	-.693*	.813**	1	0.297016	.670*	-0.292578	-0.145891	-0.200562	-.626*	-0.118575	-0.26474	0.0754334	-.842**	-.654*	-.847**	-.659*	0.0877293	0.457604	0.147406	0.213641	-.699*	-.833**	-0.361627	0.465044	0.345976	0.0100977	-0.0918747
	Sig. (2-tailed)	0.0473983	0.233506	0.174239	0.268334	0.209885	0.241288	0.0342147	0.10245	0.00289751	0.81513	0.0998183	0.869512	0.0123897	0.00130062		0.348494	0.01709	0.356086	0.650968	0.531961	0.0292908	0.713596	0.405661	0.815764	0.000584348	0.0210401	0.000502338	0.0198629	0.786304	0.134696	0.647549	0.504953	0.0114504	0.000767381	0.248078	0.127666	0.270638	0.975153	0.776427
γ-Terpinene	Pearson Correlation	0.104349	0.0660833	-0.00827352	0.0525334	.956**	0.279678	0.407781	.592*	0.543246	-0.162593	.943**	.873**	-0.415695	0.53777	0.297016	1	.660*	0.466671	-.592*	-0.572774	-0.224341	0.445116	-0.410648	-0.180293	-0.0158416	-0.37707	-0.0350484	-0.136631	-0.574741	0.100823	-0.537296	-0.508413	-0.121998	0.0131953	0.156619	.662*	-0.226305	0.425867	0.102795
	Sig. (2-tailed)	0.746895	0.838316	0.979641	0.871193	1.17209e-06	0.378644	0.188225	0.0426386	0.0679445	0.613642	4.32734e-06	0.000208614	0.178961	0.071328	0.348494		0.0194587	0.126161	0.0423587	0.0515922	0.48332	0.147052	0.184835	0.574985	0.961028	0.226942	0.913889	0.671989	0.0506119	0.755213	0.071626	0.0914496	0.705649	0.967535	0.626901	0.019059	0.479397	0.167479	0.750558
α-Terpinolene	Pearson Correlation	-0.354598	0.536053	-0.0566199	0.357842	.707*	0.296402	.755**	0.532911	.839**	0.0555377	.702*	.596*	-.775**	.721**	.670*	.660*	1	0.00160955	-0.215176	-0.18417	-0.47745	0.102344	-0.415356	0.336989	-0.407463	-0.295856	-0.414196	-0.398787	-0.00929648	0.23066	0.0109865	0.0900035	-0.423935	-0.484022	-0.232099	0.419464	0.172585	0.472415	-0.217767
	Sig. (2-tailed)	0.258069	0.0724122	0.861256	0.253429	0.0102053	0.34954	0.00448848	0.0744256	0.000650065	0.863886	0.0108836	0.0406348	0.00306859	0.0081515	0.01709	0.0194587		0.996039	0.501822	0.566652	0.116484	0.751622	0.179352	0.284105	0.188603	0.350469	0.180693	0.199107	0.977125	0.470748	0.972967	0.780882	0.169624	0.110832	0.467907	0.174651	0.5917	0.120941	0.496561
(Z)-Sabinene hydrate	Pearson Correlation	.616*	-0.451031	-0.0941059	-0.374004	0.4597	-0.163339	-0.00888635	0.343812	-0.0638859	-0.487522	0.455631	0.208998	0.15002	-0.180324	-0.292578	0.466671	0.00160955	1	-0.447207	-0.458248	0.103058	.849**	-0.201991	-0.165592	0.142109	-0.164489	0.112804	0.173622	-0.440996	-0.257114	-0.4708	-0.531067	-0.10371	0.404218	.696*	0.303488	-.643*	0.207322	0.168844
	Sig. (2-tailed)	0.0328496	0.141112	0.771124	0.231049	0.132691	0.611994	0.978134	0.273846	0.843633	0.107896	0.136602	0.514471	0.641668	0.574919	0.356086	0.126161	0.996039		0.144934	0.134078	0.749937	0.000480282	0.528981	0.607025	0.659525	0.609454	0.727052	0.589441	0.151282	0.419815	0.122395	0.0756243	0.748401	0.192491	0.0118995	0.33758	0.0240287	0.517926	0.59988
(Z)-p-Mentha-2,8-dien-1-ol	Pearson Correlation	-.587*	0.103011	0.171039	0.0825192	-0.515445	0.340361	-0.220115	-.689*	-0.44172	.775**	-.606*	-0.37856	-0.272853	-0.0908689	-0.145891	-.592*	-0.215176	-0.447207	1	.973**	0.509279	-.691*	.723**	0.221563	0.176723	.689*	0.13083	0.521597	.869**	0.481805	.869**	.823**	0.212339	-0.236311	-.599*	-.696*	0.302303	-0.521316	-0.452337
	Sig. (2-tailed)	0.0447693	0.750049	0.595075	0.798758	0.0863187	0.279009	0.491813	0.0132126	0.150533	0.00305309	0.0368056	0.224961	0.39087	0.778821	0.650968	0.0423587	0.501822	0.144934		1.00023e-07	0.090807	0.0128273	0.00791481	0.488896	0.582705	0.0132337	0.685272	0.0819922	0.000244054	0.112717	0.000243276	0.00100637	0.507614	0.459634	0.039404	0.0119257	0.339564	0.0821864	0.139822
(E)-Sabinene hydrate	Pearson Correlation	-.586*	0.214019	0.110685	0.0837846	-0.541626	0.258978	-0.212305	-.692*	-0.427683	.810**	-.620*	-0.312225	-0.235384	-0.179998	-0.200562	-0.572774	-0.18417	-0.458248	.973**	1	0.475388	-.641*	.651*	0.369492	0.260654	.775**	0.192041	0.550743	.833**	0.412837	.825**	.790**	0.192396	-0.236439	-.602*	-.695*	0.331572	-0.376503	-0.466102
	Sig. (2-tailed)	0.0454704	0.504182	0.732013	0.795729	0.0689334	0.416334	0.507683	0.0125875	0.16548	0.00140381	0.0314713	0.323142	0.461449	0.575622	0.531961	0.0515922	0.566652	0.134078	1.00023e-07		0.118297	0.0245873	0.0217963	0.237174	0.413215	0.00306196	0.54988	0.0634945	0.000778158	0.182273	0.00095969	0.0022344	0.54913	0.459384	0.0382578	0.0121302	0.292404	0.227698	0.126686
(E)-Limonene oxide	Pearson Correlation	-0.00522116	-0.181354	0.0605922	0.0682805	-0.269076	0.219484	-0.528174	-.633*	-.733**	0.324471	-0.446306	0.0131141	0.223295	-0.31013	-.626*	-0.224341	-0.47745	0.103058	0.509279	0.475388	1	-0.336594	.786**	-0.357512	.717**	.666*	.626*	.914**	0.160772	0.0661333	0.134303	0.0269759	.690*	0.45691	-0.2731	-0.269082	-0.220579	-0.305103	-0.151039
	Sig. (2-tailed)	0.987152	0.572701	0.851614	0.833006	0.397721	0.493087	0.0775324	0.0271278	0.00667907	0.303488	0.145845	0.967734	0.485416	0.326573	0.0292908	0.48332	0.116484	0.749937	0.090807	0.118297		0.284707	0.00245531	0.253899	0.00870483	0.0180587	0.029455	3.23735e-05	0.617673	0.838196	0.67731	0.933678	0.0129318	0.135365	0.390425	0.39771	0.490878	0.334884	0.639379
Terpinen-4-ol	Pearson Correlation	.647*	-0.299884	-0.150031	-0.389929	0.420266	-0.427294	0.0963227	.613*	0.208048	-.629*	0.491752	0.161818	0.203421	-0.216135	-0.118575	0.445116	0.102344	.849**	-.691*	-.641*	-0.336594	1	-.576*	0.0652257	-0.0591153	-0.35074	-0.0589051	-0.207333	-0.562067	-0.431764	-.594*	-.591*	-0.343217	0.249477	.829**	0.442943	-0.50055	0.415094	0.2276
	Sig. (2-tailed)	0.0228831	0.343635	0.641642	0.210194	0.173742	0.165907	0.765864	0.0338894	0.516428	0.0285197	0.104419	0.615355	0.526005	0.499873	0.713596	0.147052	0.751622	0.000480282	0.0128273	0.0245873	0.284707		0.0497818	0.840391	0.855197	0.263649	0.855707	0.517903	0.057162	0.161042	0.0417959	0.0428573	0.274732	0.434232	0.0008675	0.149274	0.0974272	0.179654	0.476818
p-Mentha-1(7),8-dien-2-ol	Pearson Correlation	-0.322082	-0.0725305	0.315664	0.181366	-0.426907	0.359626	-0.491161	-0.548562	-.578*	0.436253	-0.519598	-0.229693	-0.0207738	-0.194856	-0.26474	-0.410648	-0.415356	-0.201991	.723**	.651*	.786**	-.576*	1	-0.32644	0.290384	0.445983	0.16046	.697*	0.506164	0.286023	0.509526	0.423282	0.426186	0.0962615	-0.457758	-0.415443	-0.00291528	-0.440696	0.0248203
	Sig. (2-tailed)	0.307269	0.822753	0.317554	0.572675	0.166332	0.250899	0.104901	0.0647678	0.0488752	0.156248	0.0833811	0.472662	0.948906	0.543934	0.405661	0.184835	0.179352	0.528981	0.00791481	0.0217963	0.00245531	0.0497818		0.300391	0.359872	0.146171	0.618364	0.0118381	0.0931333	0.367458	0.0906244	0.170352	0.167128	0.766009	0.134549	0.179251	0.992826	0.151593	0.938969
α-Terpineol	Pearson Correlation	-0.276626	.623*	-0.134623	0.190658	-0.183931	-0.282055	0.199283	-0.135955	0.138541	0.186285	-0.126274	-0.111549	-0.167631	-0.153797	0.0754334	-0.180293	0.336989	-0.165592	0.221563	0.369492	-0.357512	0.0652257	-0.32644	1	-0.136535	0.301805	-0.13867	-0.199585	0.444066	-0.0797173	0.40733	0.465957	-0.347467	-0.418746	-0.154985	-0.301491	0.0948541	0.457007	-0.245342
	Sig. (2-tailed)	0.384086	0.030407	0.676577	0.552811	0.567163	0.374432	0.534634	0.673532	0.667636	0.562123	0.695761	0.729989	0.602542	0.6332	0.815764	0.574985	0.284105	0.607025	0.488896	0.237174	0.253899	0.840391	0.300391		0.672208	0.340399	0.667341	0.534003	0.148123	0.805473	0.188762	0.12682	0.268439	0.175467	0.630547	0.340927	0.769348	0.135272	0.442135
Dihydrocarvone	Pearson Correlation	0.315463	-0.195165	-0.3837	-0.2295	-0.139967	-0.129772	-0.456735	-0.441048	-.581*	0.337284	-0.30249	0.328252	0.416926	-0.506824	-.842**	-0.0158416	-0.407463	0.142109	0.176723	0.260654	.717**	-0.0591153	0.290384	-0.136535	1	.759**	.963**	.798**	-0.17456	-0.253853	-0.212092	-0.267222	.765**	.686*	0.0392331	-0.207988	-0.164565	0.0238237	-0.145341
	Sig. (2-tailed)	0.317879	0.543282	0.218209	0.473044	0.664389	0.687702	0.135534	0.151229	0.0477185	0.283657	0.33925	0.297558	0.177547	0.0926373	0.000584348	0.961028	0.188603	0.659525	0.582705	0.413215	0.00870483	0.855197	0.359872	0.672208		0.00417446	5.20636e-07	0.00185582	0.587401	0.425942	0.508119	0.401106	0.00371166	0.0137046	0.903648	0.516552	0.609287	0.941416	0.65221
(E)-Carveol	Pearson Correlation	-0.161233	0.0902308	-0.204302	-0.0543342	-0.41221	0.0392553	-0.348557	-.688*	-.586*	.689*	-0.573135	-0.00431529	0.0919372	-0.428325	-.654*	-0.37707	-0.295856	-0.164489	.689*	.775**	.666*	-0.35074	0.445983	0.301805	.759**	1	.720**	.771**	0.410904	0.0717246	0.370218	0.330049	0.546251	0.263966	-0.305094	-0.562767	0.106313	-0.150025	-0.494239
	Sig. (2-tailed)	0.61665	0.780341	0.524177	0.866812	0.183004	0.903593	0.266839	0.0134243	0.0450269	0.0132654	0.0514114	0.989381	0.776279	0.164777	0.0210401	0.226942	0.350469	0.609454	0.0132337	0.00306196	0.0180587	0.263649	0.146171	0.340399	0.00417446		0.00826754	0.00331306	0.184535	0.824695	0.236182	0.294762	0.0661356	0.407086	0.3349	0.0567856	0.742274	0.641655	0.10241
Carvone	Pearson Correlation	0.389916	-0.264474	-0.460192	-0.268217	-0.108965	-0.177126	-0.450677	-0.438222	-0.569588	0.303588	-0.285411	0.298209	0.443534	-0.466174	-.847**	-0.0350484	-0.414196	0.112804	0.13083	0.192041	.626*	-0.0589051	0.16046	-0.13867	.963**	.720**	1	.663*	-0.176034	-0.284418	-0.212273	-0.254433	.823**	.728**	0.119493	-0.250963	-0.188918	-0.0291035	-0.16544
	Sig. (2-tailed)	0.210211	0.40615	0.132223	0.399288	0.736044	0.58183	0.141464	0.154174	0.0532077	0.337413	0.368529	0.346469	0.148668	0.12662	0.000502338	0.913889	0.180693	0.727052	0.685272	0.54988	0.029455	0.855707	0.618364	0.667341	5.20636e-07	0.00826754		0.0188836	0.584199	0.37027	0.507749	0.424848	0.00101329	0.00720937	0.711462	0.431408	0.556509	0.928459	0.60736
Limonene-1,2-diol	Pearson Correlation	-0.0156438	-0.197352	-0.0396201	-0.152507	-0.228799	0.22035	-0.390208	-0.548885	-.637*	0.486636	-0.375459	0.11329	0.137592	-0.375792	-.659*	-0.136631	-0.398787	0.173622	0.521597	0.550743	.914**	-0.207333	.697*	-0.199585	.798**	.771**	.663*	1	0.127043	0.123022	0.102235	0.0020141	0.537336	0.422729	-0.206755	-0.294353	-0.0639662	-0.24587	-0.265847
	Sig. (2-tailed)	0.961514	0.538681	0.902701	0.636088	0.474435	0.491338	0.209838	0.0645781	0.0257899	0.108635	0.229095	0.725917	0.669797	0.228648	0.0198629	0.671989	0.199107	0.589441	0.0819922	0.0634945	3.23735e-05	0.517903	0.0118381	0.534003	0.00185582	0.00331306	0.0188836		0.693986	0.703278	0.75188	0.995043	0.071601	0.17097	0.519096	0.35304	0.843439	0.441121	0.403626
Tetradecane	Pearson Correlation	-0.549876	0.246143	0.137039	0.195865	-0.443645	0.123265	-0.125347	-0.477858	-0.215687	0.53774	-0.477106	-0.466498	-0.341277	-0.0309907	0.0877293	-0.574741	-0.00929648	-0.440996	.869**	.833**	0.160772	-0.562067	0.506164	0.444066	-0.17456	0.410904	-0.176034	0.127043	1	0.318534	.994**	.982**	-0.00603632	-0.430627	-0.488168	-.672*	0.151573	-0.300131	-0.254031
	Sig. (2-tailed)	0.0639981	0.440599	0.671059	0.541807	0.148554	0.702714	0.6979	0.116128	0.500784	0.0713468	0.116786	0.126321	0.277633	0.923831	0.786304	0.0506119	0.977125	0.151282	0.000244054	0.000778158	0.617673	0.057162	0.0931333	0.148123	0.587401	0.184535	0.584199	0.693986		0.312931	5.28686e-11	1.54934e-08	0.985146	0.16227	0.10736	0.0166924	0.63818	0.343218	0.425606
Germacrene B	Pearson Correlation	-.770**	0.0596102	.593*	0.096731	0.188326	.903**	0.277451	-0.197438	0.0901095	.627*	0.181303	0.0261264	-.726**	.634*	0.457604	0.100823	0.23066	-0.257114	0.481805	0.412837	0.0661333	-0.431764	0.286023	-0.0797173	-0.253853	0.0717246	-0.284418	0.123022	0.318534	1	0.397066	0.38692	-0.250566	-0.539406	-0.567691	-0.079653	0.463853	-.588*	-0.486919
	Sig. (2-tailed)	0.00339191	0.853996	0.0421696	0.764896	0.557769	5.85679e-05	0.382612	0.538501	0.780629	0.0292611	0.57281	0.935763	0.00753349	0.0268378	0.134696	0.755213	0.470748	0.419815	0.112717	0.182273	0.838196	0.161042	0.367458	0.805473	0.425942	0.824695	0.37027	0.703278	0.312931		0.201232	0.214043	0.43216	0.0703054	0.0541864	0.805628	0.128775	0.0441761	0.108398
Hexadecane	Pearson Correlation	-.602*	0.239895	0.195282	0.198709	-0.403396	0.195033	-0.108823	-0.466361	-0.189476	0.570529	-0.428695	-0.443813	-0.394585	0.0378313	0.147406	-0.537296	0.0109865	-0.4708	.869**	.825**	0.134303	-.594*	0.509526	0.40733	-0.212092	0.370218	-0.212273	0.102235	.994**	0.397066	1	.990**	-0.0277899	-0.476745	-0.522567	-.653*	0.182911	-0.343091	-0.248505
	Sig. (2-tailed)	0.0383546	0.45265	0.543035	0.535837	0.193484	0.54356	0.736376	0.126448	0.555322	0.0527268	0.164373	0.148382	0.20432	0.907077	0.647549	0.071626	0.972967	0.122395	0.000243276	0.00095969	0.67731	0.0417959	0.0906244	0.188762	0.508119	0.236182	0.507749	0.75188	5.28686e-11	0.201232		8.45811e-10	0.931681	0.117102	0.0813237	0.0212429	0.569351	0.27492	0.436082
Octadecane	Pearson Correlation	-.627*	0.312406	0.17883	0.239597	-0.372558	0.181832	-0.0555554	-0.399981	-0.096221	0.570165	-0.390543	-0.406191	-0.436389	0.0806734	0.213641	-0.508413	0.0900035	-0.531067	.823**	.790**	0.0269759	-.591*	0.423282	0.465957	-0.267222	0.330049	-0.254433	0.0020141	.982**	0.38692	.990**	1	-0.0627527	-0.519773	-0.52534	-.627*	0.230835	-0.281308	-0.245192
	Sig. (2-tailed)	0.0292101	0.322847	0.578144	0.453229	0.233001	0.571671	0.863843	0.197641	0.766105	0.0529129	0.209413	0.190121	0.156104	0.80318	0.504953	0.0914496	0.780882	0.0756243	0.00100637	0.0022344	0.933678	0.0428573	0.170352	0.12682	0.401106	0.294762	0.424848	0.995043	1.54934e-08	0.214043	8.45811e-10		0.846377	0.0832593	0.0794336	0.0292009	0.470402	0.375754	0.442423
Neochlorogenic acid	Pearson Correlation	0.267195	-0.152306	-0.257728	0.0984135	-0.154298	-0.0432136	-.624*	-0.483972	-.612*	0.235729	-0.351065	0.233574	0.390822	-0.338589	-.699*	-0.121998	-0.423935	-0.10371	0.212339	0.192396	.690*	-0.343217	0.426186	-0.347467	.765**	0.546251	.823**	0.537336	-0.00603632	-0.250566	-0.0277899	-0.0627527	1	.702*	-0.0552708	-0.307607	-0.292307	-0.0807813	0.120231
	Sig. (2-tailed)	0.401156	0.636537	0.418668	0.760911	0.632081	0.893918	0.02999	0.110874	0.0344118	0.460774	0.263177	0.465001	0.209059	0.281681	0.0114504	0.705649	0.169624	0.748401	0.507614	0.54913	0.0129318	0.274732	0.167128	0.268439	0.00371166	0.0661356	0.00101329	0.071601	0.985146	0.43216	0.931681	0.846377		0.0108511	0.864534	0.330731	0.356552	0.802922	0.709749
Chlorogenic acid	Pearson Correlation	.794**	-0.496598	-0.522735	-0.329001	-0.0719431	-0.282199	-0.403708	-0.123319	-0.48065	-0.188668	-0.182025	0.187935	.645*	-.577*	-.833**	0.0131953	-0.484022	0.404218	-0.236311	-0.236439	0.45691	0.249477	0.0962615	-0.418746	.686*	0.263966	.728**	0.422729	-0.430627	-0.539406	-0.476745	-0.519773	.702*	1	0.560415	-0.186424	-0.354866	0.0770785	0.297819
	Sig. (2-tailed)	0.00204021	0.100528	0.081208	0.29639	0.824169	0.374179	0.193106	0.70259	0.113709	0.557042	0.571257	0.558603	0.023661	0.0496688	0.000767381	0.967535	0.110832	0.192491	0.459634	0.459384	0.135365	0.434232	0.766009	0.175467	0.0137046	0.407086	0.00720937	0.17097	0.16227	0.0703054	0.117102	0.0832593	0.0108511		0.0580568	0.561828	0.257684	0.811809	0.347129
4-O-Caffeoylquinic acid	Pearson Correlation	.887**	-.623*	-0.388198	-.617*	0.163255	-0.547038	-0.0958253	0.479901	0.00023976	-.585*	0.214129	-0.0448394	0.461576	-0.435137	-0.361627	0.156619	-0.232099	.696*	-.599*	-.602*	-0.2731	.829**	-0.457758	-0.154985	0.0392331	-0.305094	0.119493	-0.206755	-0.488168	-0.567691	-0.522567	-0.52534	-0.0552708	0.560415	1	0.110299	-0.435081	0.163003	0.369958
	Sig. (2-tailed)	0.000120071	0.0304337	0.212403	0.0324192	0.612179	0.0656676	0.767043	0.114355	0.99941	0.0459035	0.503957	0.889948	0.130913	0.157431	0.248078	0.626901	0.467907	0.0118995	0.039404	0.0382578	0.390425	0.0008675	0.134549	0.630547	0.903648	0.3349	0.711462	0.519096	0.10736	0.0541864	0.0813237	0.0794336	0.864534	0.0580568		0.732916	0.157491	0.612734	0.236538
Neoxantin	Pearson Correlation	0.0617914	0.0711122	0.220988	0.149353	.636*	0.00772609	0.289132	.702*	0.569023	-0.495891	.656*	0.452379	-0.16988	0.470415	0.465044	.662*	0.419464	0.303488	-.696*	-.695*	-0.269082	0.442943	-0.415443	-0.301491	-0.207988	-0.562767	-0.250963	-0.294353	-.672*	-0.079653	-.653*	-.627*	-0.307607	-0.186424	0.110299	1	-0.156974	0.302405	0.0383769
	Sig. (2-tailed)	0.848707	0.826172	0.490053	0.643167	0.0261057	0.980988	0.362041	0.0108931	0.0534979	0.101089	0.020408	0.139781	0.597611	0.122743	0.127666	0.019059	0.174651	0.33758	0.0119257	0.0121302	0.39771	0.149274	0.179251	0.340927	0.516552	0.0567856	0.431408	0.35304	0.0166924	0.805628	0.0212429	0.0292009	0.330731	0.561828	0.732916		0.626111	0.339392	0.905742
Violaxantin	Pearson Correlation	-0.501109	0.144927	-0.0898695	-0.110691	-0.238013	0.37804	0.545571	-0.0373842	0.360197	0.543354	-0.203538	-0.0956748	-0.353897	0.297917	0.345976	-0.226305	0.172585	-.643*	0.302303	0.331572	-0.220579	-0.50055	-0.00291528	0.0948541	-0.164565	0.106313	-0.188918	-0.0639662	0.151573	0.463853	0.182911	0.230835	-0.292307	-0.354866	-0.435081	-0.156974	1	-0.327767	-0.520251
	Sig. (2-tailed)	0.0969939	0.653145	0.781201	0.731997	0.456311	0.225651	0.0665421	0.908171	0.250092	0.0678791	0.525761	0.7674	0.259077	0.346963	0.270638	0.479397	0.5917	0.0240287	0.339564	0.292404	0.490878	0.0974272	0.992826	0.769348	0.609287	0.742274	0.556509	0.843439	0.63818	0.128775	0.569351	0.470402	0.356552	0.257684	0.157491	0.626111		0.298314	0.0829259
Lutein	Pearson Correlation	0.248767	.588*	-0.306402	0.375522	0.280809	-0.435397	0.148311	0.346205	0.340064	-0.406781	0.323502	0.48921	0.106234	-0.134726	0.0100977	0.425867	0.472415	0.207322	-0.521316	-0.376503	-0.305103	0.415094	-0.440696	0.457007	0.0238237	-0.150025	-0.0291035	-0.24587	-0.300131	-.588*	-0.343091	-0.281308	-0.0807813	0.0770785	0.163003	0.302405	-0.327767	1	0.392216
	Sig. (2-tailed)	0.435582	0.0443652	0.332725	0.22901	0.376637	0.157154	0.64551	0.270299	0.279456	0.189417	0.305018	0.1065	0.742458	0.676342	0.975153	0.167479	0.120941	0.517926	0.0821864	0.227698	0.334884	0.179654	0.151593	0.135272	0.941416	0.641655	0.928459	0.441121	0.343218	0.0441761	0.27492	0.375754	0.802922	0.811809	0.612734	0.339392	0.298314		0.207296
β-Carotene	Pearson Correlation	0.443166	-0.0412825	0.0514175	0.139219	-0.0113839	-0.342391	-0.410148	0.186155	-0.122646	-0.565271	0.106382	0.0199216	0.451527	-0.323048	-0.0918747	0.102795	-0.217767	0.168844	-0.452337	-0.466102	-0.151039	0.2276	0.0248203	-0.245342	-0.145341	-0.494239	-0.16544	-0.265847	-0.254031	-0.486919	-0.248505	-0.245192	0.120231	0.297819	0.369958	0.0383769	-0.520251	0.392216	1
	Sig. (2-tailed)	0.149044	0.898637	0.87391	0.666091	0.97199	0.275965	0.185424	0.562401	0.704149	0.0554534	0.74211	0.951	0.140622	0.305737	0.776427	0.750558	0.496561	0.59988	0.139822	0.126686	0.639379	0.476818	0.938969	0.442135	0.65221	0.10241	0.60736	0.403626	0.425606	0.108398	0.436082	0.442423	0.709749	0.347129	0.236538	0.905742	0.0829259	0.207296
*. Correlation is significant at the 0.05 level (2-tailed).
**. Correlation is significant at the 0.01 level (2-tailed).
